# Supplementary material for: Effects of Continuous Care on Gestational Diabetes Mellitus Patients: A Systematic Review and Meta-analysis of 22 RCTs
Source: Research Square preprint supplement (doi:10.21203/rs.3.rs-7893643/v1), 2025-10-29
Supplement: Supplementary file 1 [file 208b706b79f6e93bac8c764b.docx]

Table S1. Major search Strategy details

Pubmed

| # | Searches | Results |
| --- | --- | --- |
| 1 | Search gestational diabetes [mh] | 1,019,105 |
| 2 | Search gestational diabetes [Title/Abstract] | 487,777 |
| 3 | Search (((((((GDM [Title/Abstract]) OR pregnancy induced diabetes [Title/Abstract]) OR gestational diabetes mellitus [Title/Abstract]) OR Gestational diabetes[Title/Abstract]) OR Abnormal glucose tolerance[Title/Abstract]) OR Diabetes mellitus in pregnancy[Title/Abstract]) OR Hyperglycemia during pregnancy [Title/Abstract] OR Carbohydrate [Title/Abstract]) | 606,883 |
| 4 | Search (1 or 2 or 3) | 1,368,504 |
| 5 | Search Continuing nursing [mh] | 3,895 |
| 6 | Search (((continuous guidance [Title/Abstract]) OR collaborative care [Title/Abstract]) OR discharge plan carecontinuity of care ) | 7,011 |
| 7 | Search (5 or 6) | 7,503 |
| 8 | Search (4 and 7) | 290 |

Embase

| # | Searches | Results |
| --- | --- | --- |
| 1 | ' gestational diabetes '/exp | 894,341 |
| 2 | ' GDM ':ab,ti OR ' pregnancy induced diabetes ':ab,ti OR ' gestational diabetes mellitus ':ab,ti OR ' Gestational diabetes':ab,ti OR ' Abnormal glucose tolerance':ab,ti OR ' Diabetes mellitus in pregnancy':ab,ti OR ' Hyperglycemia during pregnancy ':ab,ti OR ' Carbohydrate ':ab,ti | 798,726 |
| 3 | 1 or 2 | 1,383,838 |
| 4 | ' Continuing nursing '/exp | 11,818 |
| 5 | ' continuous guidance ':ab,ti OR ' collaborative care ':ab,ti OR ' discharge plan carecontinuity of care ':ab,ti | 9,911 |
| 6 | 4 or 5 | 13,831 |
| 7 | 3 AND 6 | 459 |

Cochrane Library

| # | Searches | Results |
| --- | --- | --- |
| 1 | [mh " gestational diabetes "] | 76,707 |
| 2 | (GDM OR pregnancy induced diabetes OR gestational diabetes mellitus OR Gestational diabetes OR Abnormal glucose tolerance OR diabetes mellitus in pregnancy OR Hyperglycemia during pregnancy OR Carbohydrate):ti,ab,kw | 67,643 |
| 3 | #1 or #2 | 104,951 |
| 4 | [mh " continuing nursing "] | 5,738 |
| 5 | (continuous guidance or collaborative care or discharge plan carecontinuity of care ):ti,ab,kw | 5,394 |
| 6 | #4 or #5 | 5,738 |
| 7 | animal*:ti,ab,kw | 38,970 |
| 8 | human*:ti,ab,kw | 1,271,430 |
| 9 | #7 not #8 | 5,621 |
| 10 | #3 and #6 | 345 |
| 11 | #10 not #9 | 344 |

ClinicalTrials.gov

| # | Searche Conditions | Results |
| --- | --- | --- |
| 1 | (continuing nursing OR collaborative care OR discharge plan carecontinuity of care ) AND (GDM OR pregnancy induced diabetes OR gestational diabetes mellitus OR Gestational diabetes OR Abnormal glucose tolerance OR Diabetes mellitus in pregnancy OR Hyperglycemia during pregnancy OR Carbohydrate) | 0 |
